# Supplementary material for: The rhizobacterium Variovorax paradoxus 5C-2, containing ACC deaminase, promotes growth and development of Arabidopsis thaliana via an ethylene-dependent pathway
Source: PubMed Central journal article supplement — J Exp Bot. 2013 Feb 11;64(6):1565–73. doi: 10.1093/jxb/ert031 (PMC3617834; doi:10.1093/jxb/ert031), 2013-02-11

Supplementary Figure 1. Plates from inoculated (left) and control (right) roots at 1 (top), 10 (middle) and 100 (bottom) times dilution. A single plate of a pure culture of *V. paradoxus* 5C-2 is included (bottom of Figure) for comparison.

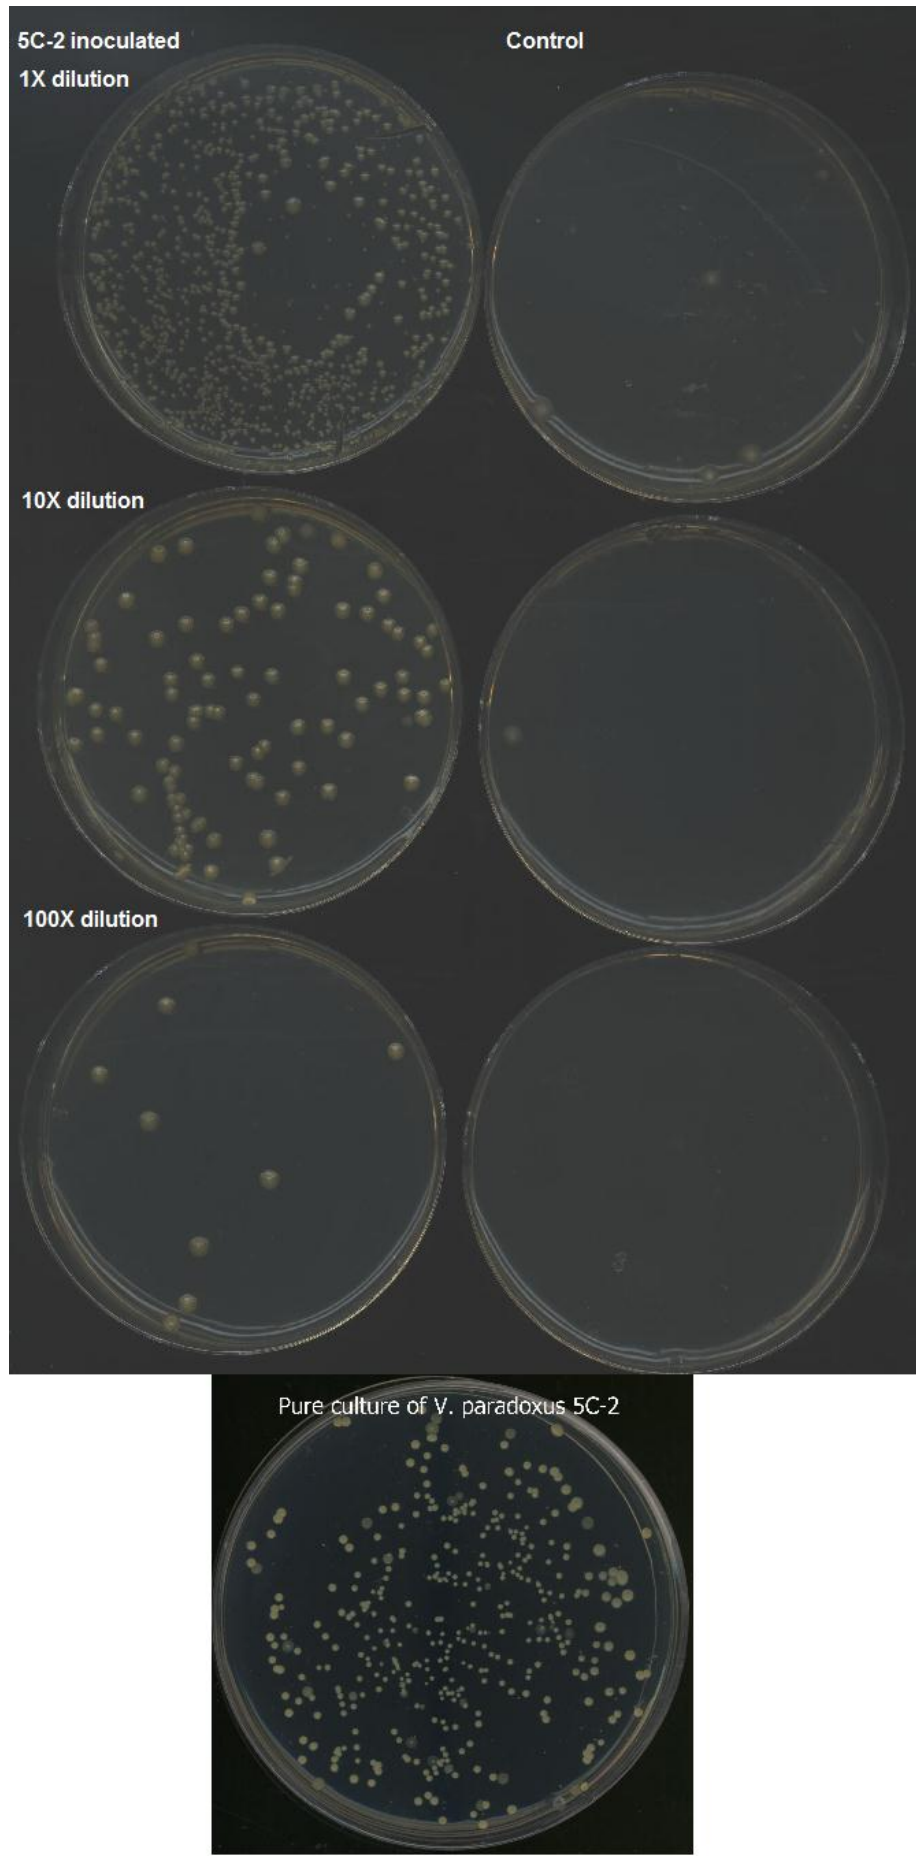

Supplement: supp_ert031_jexbot090902_file001.pdf [file supp_ert031_jexbot090902_file001.pdf]
